# Supplementary material for: Modeling Long-Term Corn Yield Response to Nitrogen Rate and Crop Rotation
Source: PubMed Central journal article supplement (PMC5104953; doi:10.3389/fpls.2016.01630), 2016-11-11
Supplement: Data_Sheet_1.pdf [file Data_Sheet_1.pdf]

## **Supplementary material**

### **Modeling Long Term Corn Yield Response to Nitrogen Rate and Crop**

Laila A. Puntel, John E. Sawyer, Daniel W. Barker, Ranae Dietzel, Hanna Poffenbarger, Michael Castellano, Kenneth J. Moore, Peter Thorburn and Sotirios V. Archontoulis

Front. Plant Sci. 7:1630.doi: 10.3389/fpls.2016.01630

### Supplementary table S1

**Table S1.** Corn and soybean management practices available at the time of simulation: planting date, date of N application, N source, hybrid, relative maturity and seed planting density for corn-corn and corn-soybean rotation from 1999 to 2014.

| <b>Year</b> | <b>Corn planting date</b> | <b>Date of N application in corn</b> | <b>N source</b> | <b>Corn relative maturity</b> | <b>Soybean planting date</b> |
|-------------|---------------------------|--------------------------------------|-----------------|-------------------------------|------------------------------|
| 1999        | 19-May                    | 3-May                                | urea            | 107                           | 19-May                       |
| 2000        | 5-May                     | 2-May                                | urea            | 107                           | 5-May                        |
| 2001        | 9-May                     | 1-May                                | urea            | 104                           | 9-May                        |
| 2002        | 3-May                     | 26-Apr                               | urea            | 105                           | 3-May                        |
| 2003        | 29-Apr                    | 22-Apr                               | urea            | 108                           | 29-Apr                       |
| 2004        | 27-Apr                    | 15-Apr                               | urea            | 107                           | 11-May                       |
| 2005        | 10-May                    | 3-May                                | urea            | 105                           | 10-May                       |
| 2006        | 9-May                     | 4-May                                | urea            | 106                           | 18-May                       |
| 2007        | 13-May                    | 1-May                                | urea            | 109                           | 18-May                       |
| 2008        | 14-May                    | 6-May                                | urea            | 111                           | 20-May                       |
| 2009        | 5-May                     | 12-May                               | 32% UAN         | 105                           | 8-May                        |
| 2010        | 29-Apr                    | 5-May                                | 32% UAN         | 105                           | 6-May                        |
| 2011        | 11-May                    | 19-May                               | 32% UAN         | 106                           | 19-May                       |
| 2012        | 10-May                    | 10-May                               | 32% UAN         | 105                           | 15-May                       |
| 2013        | 24-May                    | 13-Jun                               | 32% UAN         | 104                           | 13-Jun                       |
| 2014        | 7-May                     | 6-May                                | urea            | 105                           | 20-May                       |

## Supplementary table S2

**Table S2.** APSIM corn and soybean cultivar and crop model specific parameter values used in this study. When more than one value is given (see soybean), this means that there is an array of values for the specific parameter.

| Acronym                                                                    | Value                          | Unit                       |
|----------------------------------------------------------------------------|--------------------------------|----------------------------|
| <b>Corn</b>                                                                |                                |                            |
| tt_emerg_to_endjuv (thermal time from emergence to end juvenile)           | 250                            | °C-days                    |
| tt_flower_to_maturity (thermal time from flowering to phys maturity)       | 812                            | °C-days                    |
| head_grain_no (potential kernel number per ear)                            | 800                            | #                          |
| grain_gth_rate (grain growth rate)                                         | 9.17                           | mg/rain/day                |
| tt_flower_to_start_grain (thermal time from flowering to start grain fill) | 170                            | °C-days                    |
| tt_maturity_to_ripe (thermal time from maturity to harvest)                | 150                            | °C-days                    |
| <b>Soybean</b>                                                             |                                |                            |
| x_pp_hi_incr (photoperiod)                                                 | 1, 24                          | Hours                      |
| y_hi_incr (daily rate of harvest index)                                    | 0.01, 0.01                     | 1/days                     |
| x_hi_max_pot_stress (stress index)                                         | 0.0, 1.0                       | (-)                        |
| y_hi_max_pot (maximum value for harvest index)                             | 0.5, 0.5                       | (-)                        |
| tt_emergence (thermal time to emergence)                                   | 100, 100                       | °C-days                    |
| x_pp (photoperiod levels)                                                  | 13.59, 14.6, 15.6, 16.6        | Hour                       |
| y_tt_end_of_juvenile <sup>1</sup> (thermal time to juvenile)               | 100, 133, 200, 400             | °C-days                    |
| y_tt_floral_initiation (thermal time from end of juv to floral initiation) | 128, 171, 256, 512             | °C-days                    |
| y_tt_flowering (thermal time from flowering to start grain fill)           | 246, 328, 492, 1312            | °C-days                    |
| y_tt_start_grain_fill (thermal time from start to end of grain fill)       | 499, 666, 999, 2664            | °C-days                    |
| tt_end_grain_fill (thermal time from end grain fill to maturity)           | 20                             | °C-days                    |
| tt_maturity (thermal time from maturity to harvest)                        | 70                             | °C-days                    |
| node_sen_rate (node senescence rate)                                       | 95                             | °C-days node <sup>-1</sup> |
| Twilight (twilight)                                                        | 0                              | (-)                        |
| x_stage for N fixation (crop stage number)                                 | 3, 4, 5, 6, 7                  | stage #                    |
| N_fix_rate (Nn fixation rate)                                              | 0.0006, 0.0016, 0.0016, 0.0009 | gN/gDM                     |
| x_stage for N concentration (crop stage number)                            | 3, 6, 9                        | stage #                    |
| y_n_conc_min_leaf (minimum N concentration in leaves)                      | 0.02, 0.01, 0.0085             | gN/gDM                     |
| y_n_conc_crit_leaf (critical N concentration in leaves)                    | 0.06, 0.05, 0.02               | gN/gDM                     |
| y_n_conc_max_leaf (maximum N concentration in leaves)                      | 0.06, 0.05, 0.025              | gN/gDM                     |
| y_n_conc_crit_stem (critical N concentration in stems)                     | 0.03, 0.02, 0.008              | gN/gDM                     |
| y_n_conc_max_stem (minimum N concentration in stems)                       | 0.03, 0.02, 0.008              | gN/gDM                     |
| y_n_conc_crit_pod (critical N concentration in pods)                       | 0.06, 0.06, 0.005              | gN/gDM                     |
| y_n_conc_max_pod (maximum N concentration in pod)                          | 0.06, 0.06, 0.008              | gN/gDM                     |

### Supplementary table S3

**Table S3.** Soil profile values from the initialization period (1993 to 1999). The values refer to the start of the simulation on 1/1/1999. BD, bulk density; LL, lower limit; DUL, drained upper limit; SAT, saturated volumetric water content; SW, soil water ; Corn and Soy KL, parameters defining capacity to extract water per day; OC, soil organic carbon; Finert, inert of soil organic C (not decomposing); Fbiom, microbial SOC (fast decomposing); Hum, humic SOC (medium decomposing); and NO<sub>3</sub>-N, soil nitrate.

| Soil layer | BD                 | LL                              | DUL   | SAT   | SW    | Corn KL         | Soy KL          | OC                   | Finert                            | Fbiom | Hum   | NO <sub>3</sub> -N  |
|------------|--------------------|---------------------------------|-------|-------|-------|-----------------|-----------------|----------------------|-----------------------------------|-------|-------|---------------------|
| cm         | Mg m <sup>-3</sup> | ----- mm mm <sup>-1</sup> ----- |       |       |       | d <sup>-1</sup> | d <sup>-1</sup> | g 100g <sup>-1</sup> | ----- kg C ha <sup>-1</sup> ----- |       |       | Kg ha <sup>-1</sup> |
| 0 to 8     | 1.300              | 0.164                           | 0.299 | 0.459 | 0.275 | 0.080           | 0.080           | 2.00                 | 8008                              | 1183  | 11609 | 0.25                |
| 8 to 16    | 1.300              | 0.164                           | 0.299 | 0.459 | 0.263 | 0.075           | 0.075           | 1.98                 | 8442                              | 741   | 11345 | 0.30                |
| 16 to 31   | 1.367              | 0.159                           | 0.296 | 0.434 | 0.276 | 0.070           | 0.070           | 1.66                 | 16851                             | 1004  | 16054 | 0.60                |
| 31 to 54   | 1.425              | 0.145                           | 0.286 | 0.413 | 0.283 | 0.060           | 0.060           | 1.39                 | 29835                             | 293   | 14911 | 1.00                |
| 54 to 74   | 1.450              | 0.133                           | 0.278 | 0.403 | 0.278 | 0.050           | 0.050           | 1.15                 | 26784                             | 171   | 6395  | 1.20                |
| 74 to 102  | 1.550              | 0.132                           | 0.277 | 0.365 | 0.277 | 0.043           | 0.043           | 0.43                 | 15020                             | 169   | 3631  | 0.40                |
| 102 to 120 | 1.600              | 0.132                           | 0.276 | 0.346 | 0.276 | 0.035           | 0.035           | 0.15                 | 3417                              | 73    | 830   | 0.05                |
| 120 to 150 | 1.600              | 0.132                           | 0.276 | 0.346 | 0.323 | 0.030           | 0.000           | 0.15                 | 6178                              | 64    | 959   | 0.05                |
| 150 to 199 | 1.600              | 0.132                           | 0.276 | 0.346 | 0.346 | 0.000           | 0.000           | 0.15                 | 11416                             | 20    | 324   | 0.00                |

### Supplementary figure S1

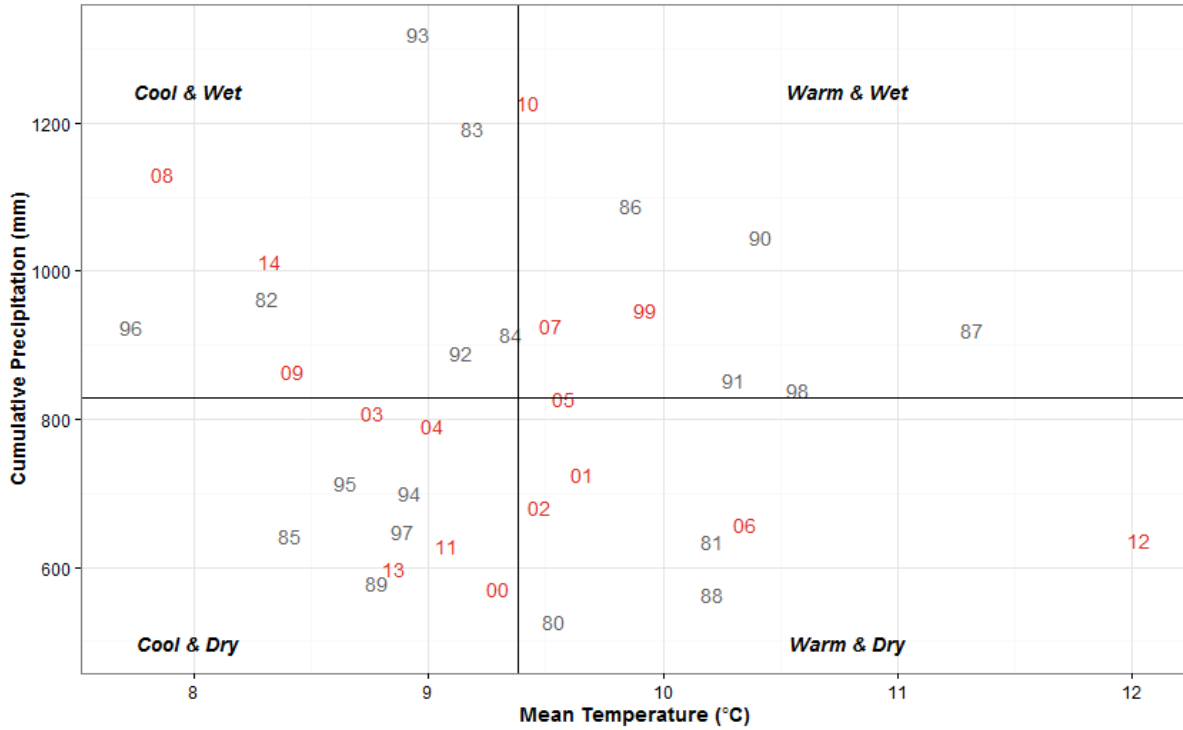

**Figure S1.** Cumulative annual precipitation and mean temperature in Ames, Iowa, USA. The long term average cumulative precipitation and temperature across years (1980-2014) are shown with the vertical and horizontal lines, respectively. These average values were used as classification criteria to separate years into warm, cool, dry, and wet. Years shown in red represent the years used in this study (1999–2014).

## Supplementary figure S2 and APSIM diagnosis

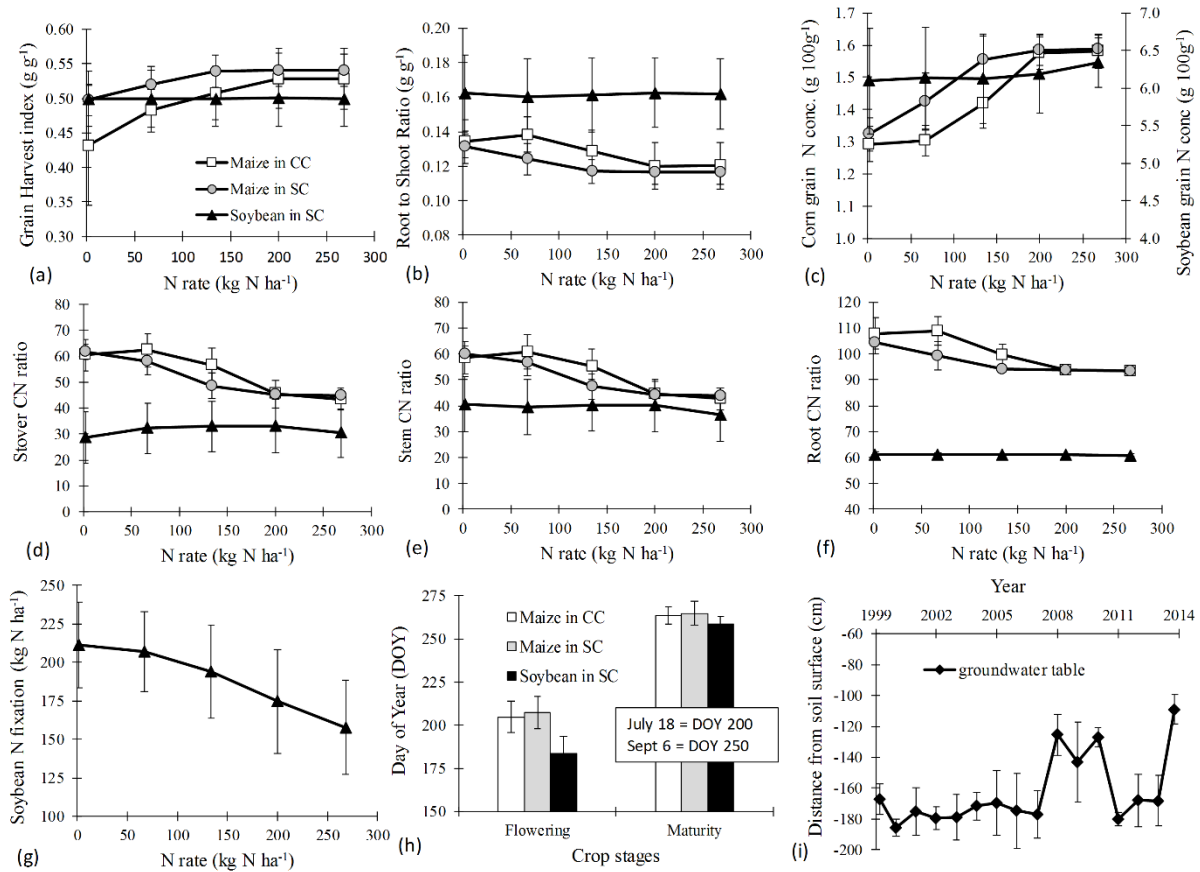

**Figure S2.** Simulation of grain harvest index at harvest (a), root to shoot ratio at harvest (b), grain N concentration at harvest (c), stover (above ground biomass minus grain), stem and root C to N ratio at harvest (d, e, and f, respectively), soybean N fixation (g), time to flowering and maturity (h) and year to year fluctuation of groundwater table at harvest (i, average trend across cropping systems and N-rates). The points (squares, cycles and triangles) are average values across experimental years (1999-2014) and the corresponding vertical bars represent the standard deviation. CC: continuous corn, SC: soybean-corn rotation, and SC\_val: soybean-corn rotation data set used for validation.

### APSIM diagnostics

One of the major goals in testing model performance is to evaluate the behavior of the model. Figure S1 illustrates simulated results (1999–2014) from the calibrated model for key model variables. In the absence of specific measurements, these results were judged by experts and literature information and found to be reasonable. The simulated grain harvest index ranged from 0.43 to 0.55 and was affected by N rate in corn. The root to shoot ratio at harvest showed a small decline with N application rate and was about 0.13 and 0.16 for corn and soybean, respectively. The grain N concentration was different between corn and soybean crops (1.5 vs. 6.5%, respectively) and it showed a positive response to N rate. Stover (above ground biomass minus grain), stem, and root N concentration and C:N ratios were different between crops, showed a

response to N-rate while their simulated values were within the range of values reported in the literature (Ciampitti and Vyn, 2012; Al-Kaisi et al., 2005; Salvagiotti et al., 2008). The simulated soybean N fixation was on average 180 kg N/ha and showed a strong response to residual N, in line with literature findings (Salvagiotti et al., 2008). Simulation of flowering and physiological maturity for both crops reflected very well what is usually observed in this region. Finally the groundwater table varied from year to year and was shallower in wetter years such as 2008, 2010 and 2014 (Fig. S1i, and Fig. 1).

#### References cited:

Ciampitti, I.A., Vyn, T.J. (2012). Physiological perspectives of changes over time in maize yield dependency on nitrogen uptake and associated nitrogen efficiencies: A review. *Field Crops Res.* 133, 48-67.

Al-Kaisi, M.M., Yin, X.H., Licht, M.A. (2005). Soil carbon and nitrogen changes as affected by tillage system and crop biomass in a corn–soybean rotation. *Appl. Soil Ecol.* 30, 174–191.

Salvagiotti, F., Specht, J.E., Cassman, K.G., Walters, D.T., Weiss, A., Dobermann, A. (2008). Growth and nitrogen fixation in high yielding soybean: impact of nitrogen fertilization. *Agron J.*, 101, 958–970.

Supplementary figure S3

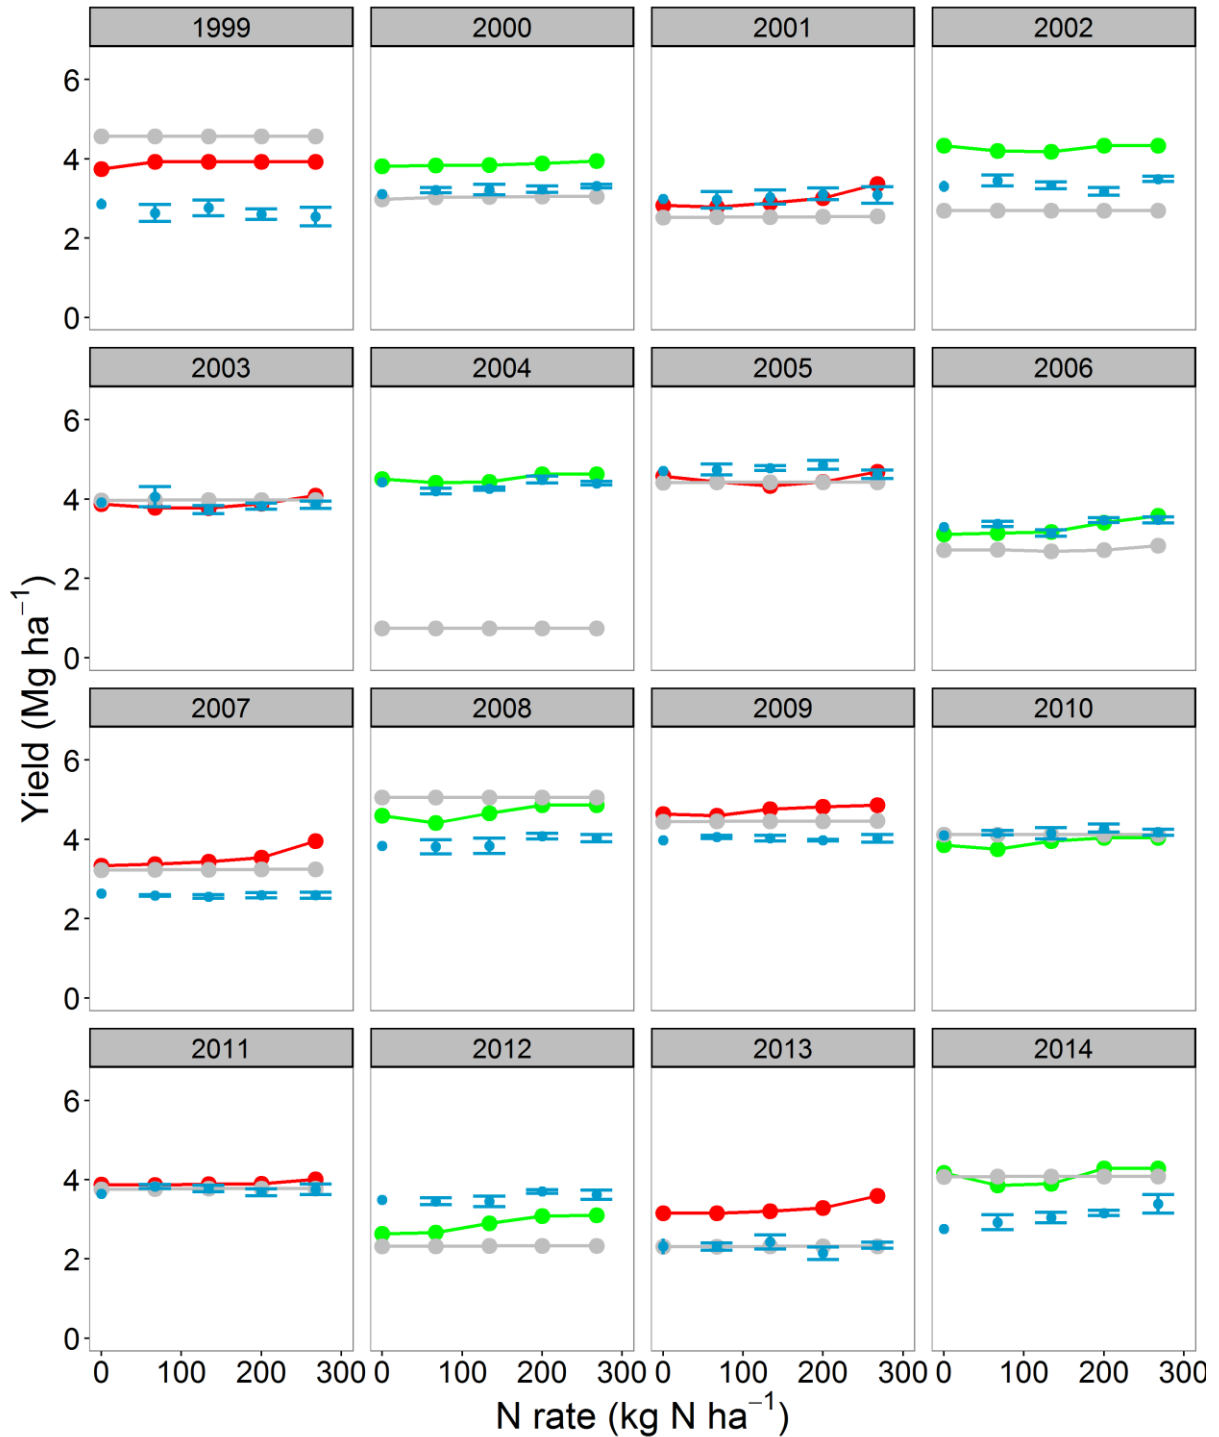

**Figure S3.** Soybean grain yield versus N rate applied to the previous year corn in the soybean-corn rotation. The blue points with standard errors (n=4) indicate the measurements. The grey, red, and green connected points indicate uncalibrated, calibrated and validated simulations from the APISM model.



### Supplementary figure S4

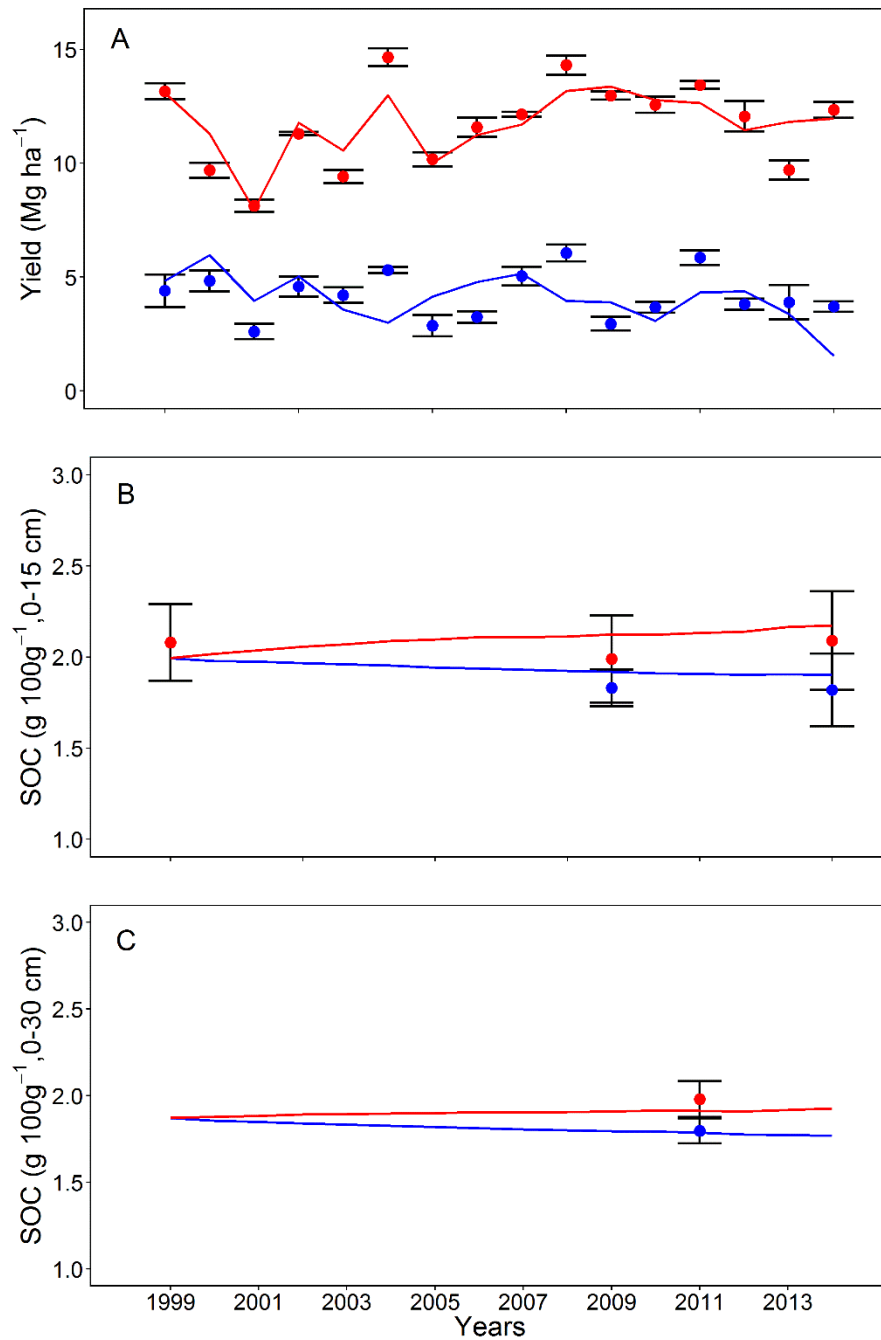

**Figure S4.** Temporal variability in corn yield (A) and soil organic carbon (SOC) changes at 0-15 cm (B) and at 0-30 cm (C) for the continuous corn system. Continuous lines are simulations from the calibrated APSIM model and points are observations. Color blue and red refers to 0 and 268 kg N ha<sup>-1</sup> treatments, respectively. Vertical bars represent the standard error of the observed mean.

### Supplementary figure S5 and S6

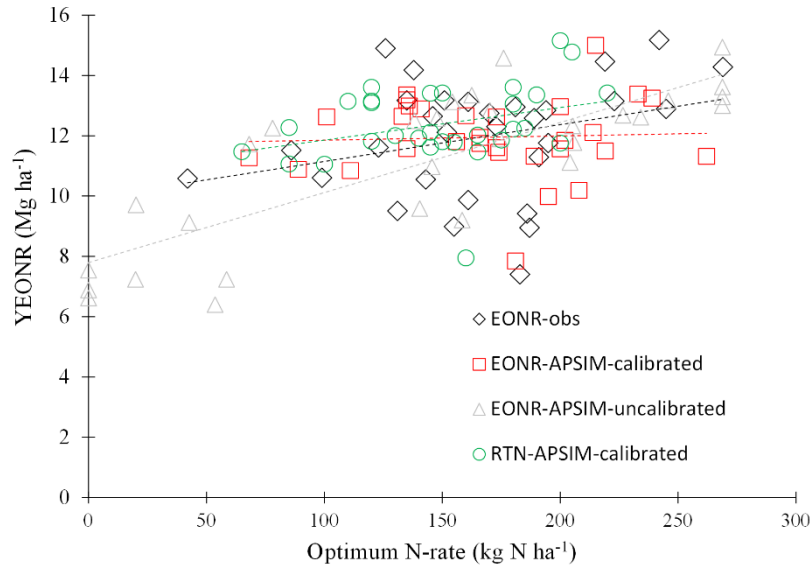

**Figure S5.** Relationship between yield at the economic optimum N rate (YEONR) and the optimum N-rate for continuous corn and soybean-corn rotation. Dashed lines indicate non-significant trends.

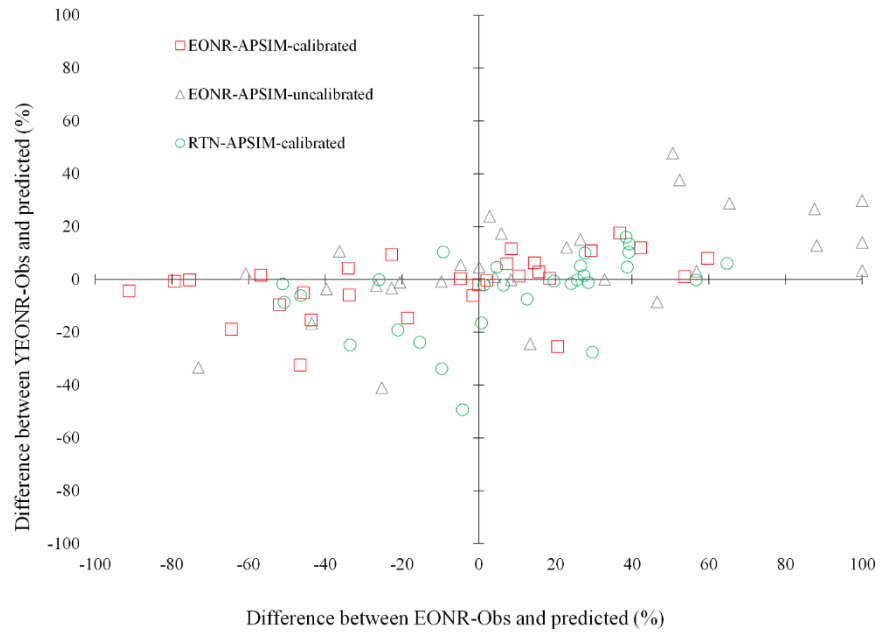

**Figure S6.** Relative difference between predicted and observed economic optimum N rate (EONR, x-axis) and between simulated and observed yield at optimum N rate (YEONR, y-axis).

**Supplementary figure S7**

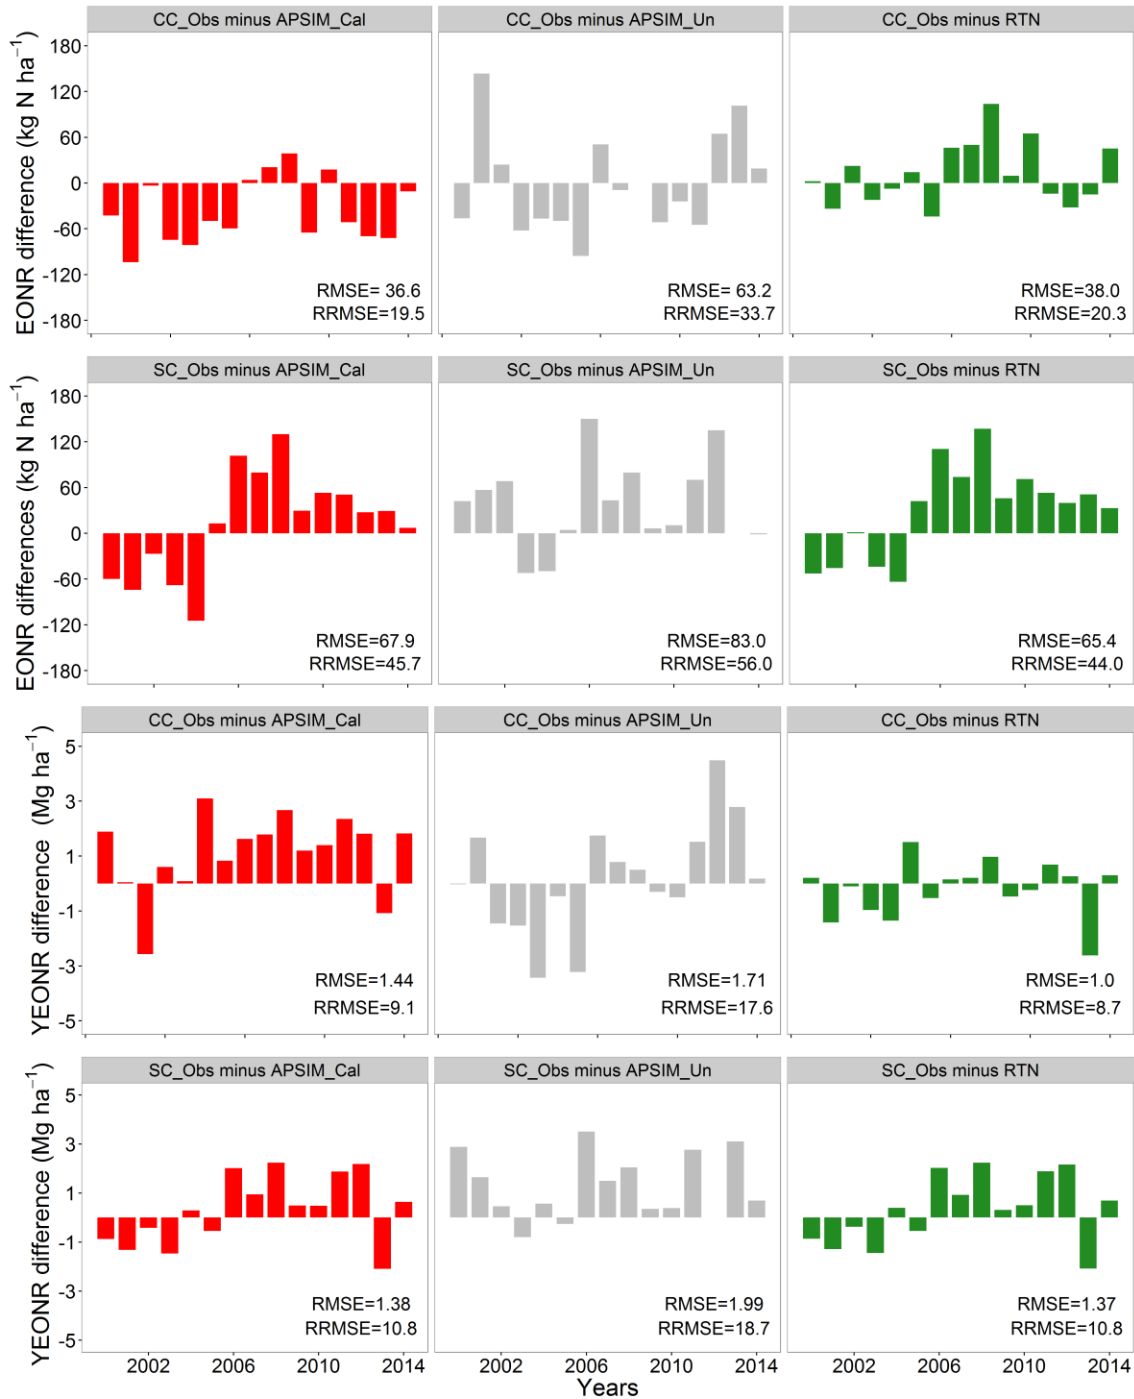

**Figure S7.** Annual difference between simulated and observed economic optimum N rate (EONR) and yield at the EONR (YEONR). The first part of each acronym within a panel heading refers to the crop sequences (CC, continuous corn and SC, soybean-corn). The second part refers to the differences being shown; for example Obs minus APSIM\_cal = EONR-Obs minus EONR-APSIM\_cal, and RTN refers to return to N approach from the calibrated model.

### Supplementary figure S8

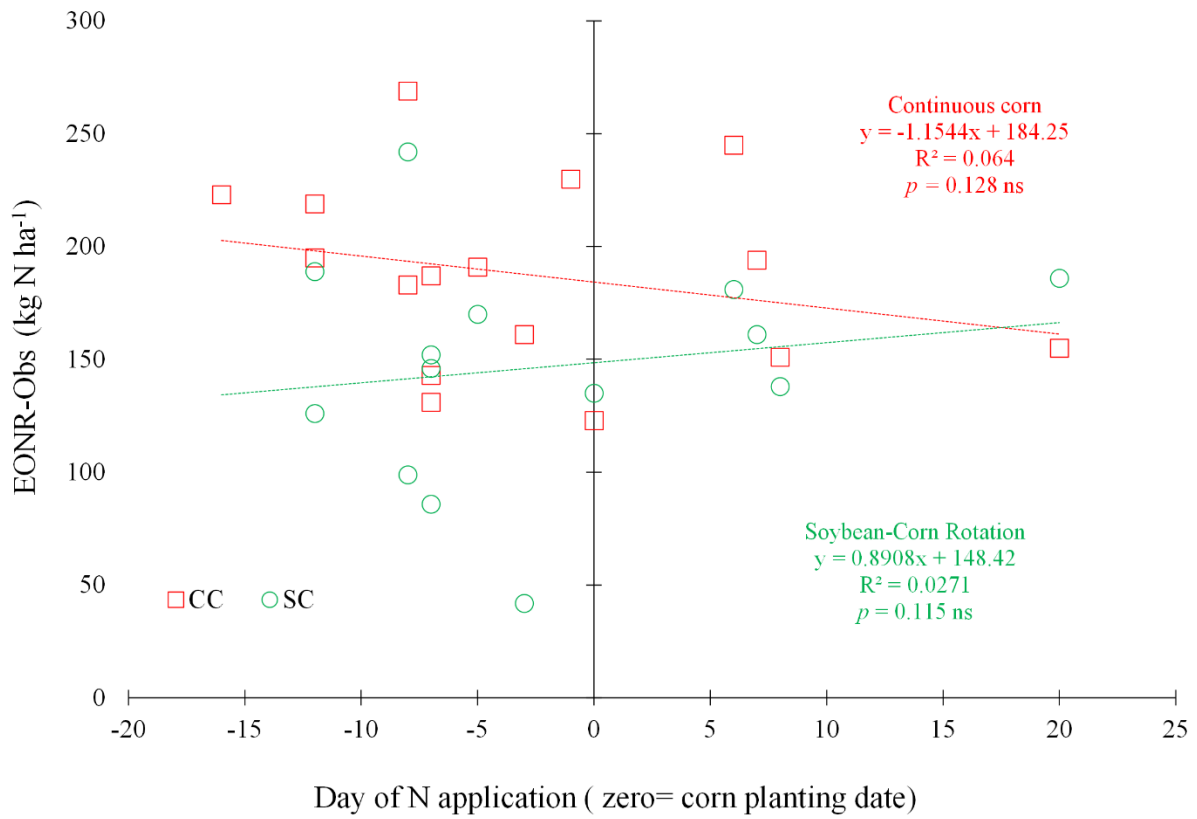

**Figure S8.** Economic optimum N rate (EONR) from observations versus time of N application relative to corn planting date. Dotted lines indicate non-significant trends.

### Supplementary figure S9

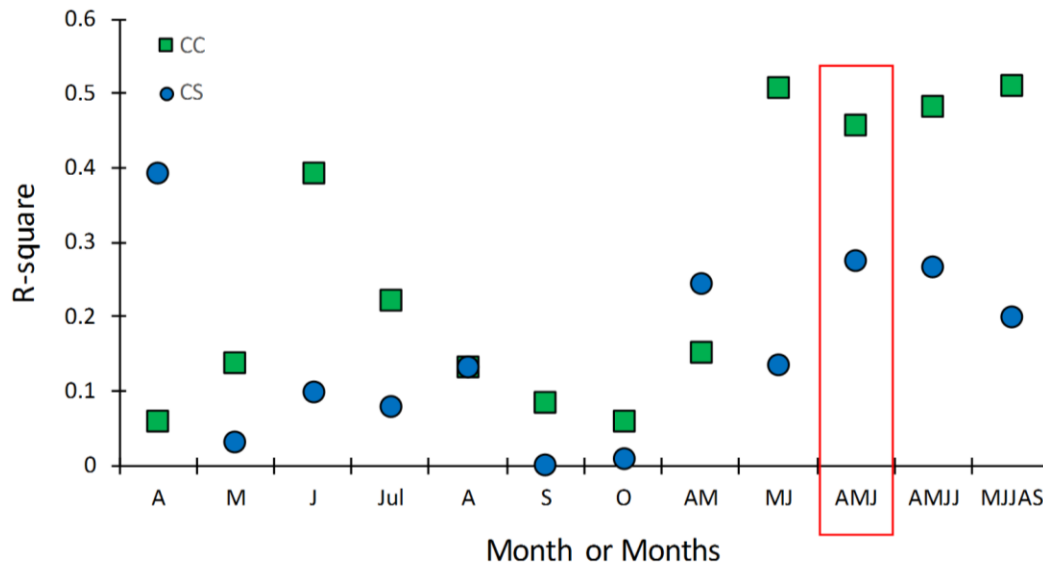

**Figure S9.** The R-square values derived from linear regression between observed economic optimum N rate (EONR-Obs) and precipitation for different months or a combination of months. A: April, M: May, J: June, Jul: July, A: August, S: September, O: October, AM: April to May, MJ: May to June, AMJ: April to June, AMJJ: April to July and MJJAS: May to September. Red box indicates the selected period used for further analysis (see main text, Fig. 9).
